# Supplementary material for: Tonabersat Inhibits Connexin43 Hemichannel Opening and Inflammasome Activation in an In Vitro Retinal Epithelial Cell Model of Diabetic Retinopathy
Source: MDPI journal article supplement (doi:10.3390/ijms22010298), 2020-12-30
Supplement: s1 [file s1]

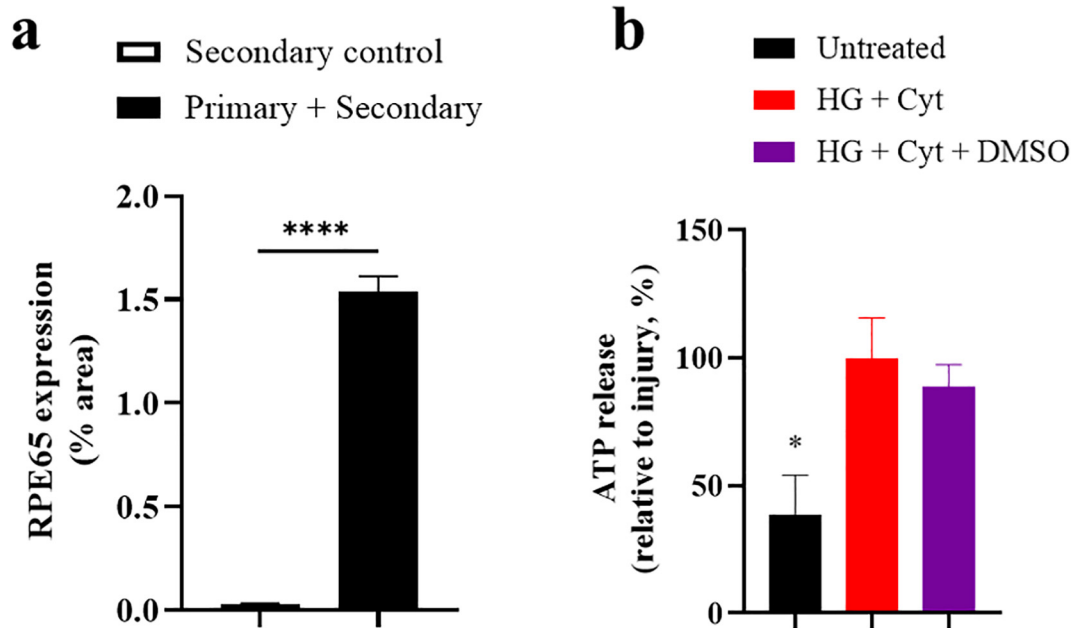

Figure S1: (a): Immunohistochemistry was used to confirm the RPE phenotype in the cultured AR-PE-19 cell line using antibodies against retinal pigment epithelium-65 (RPE-65). (b): To confirm that the DMSO solution used to dissolve the tonabersat did not produce cytotoxic effects, a DMSO treatment group (HG + Cyt + DMSO) was added. \*  $p < 0.05$ ; \*\*\*\*  $p \leq 0.0001$
